# Supplementary material for: Tissue Inhibitor of Metalloproteinases-1 Overexpression Mediates Chemoresistance in Triple-Negative Breast Cancer Cells
Source: MDPI journal article supplement (doi:10.3390/cells12131809), 2023-07-07
Supplement: s1 [file s1]

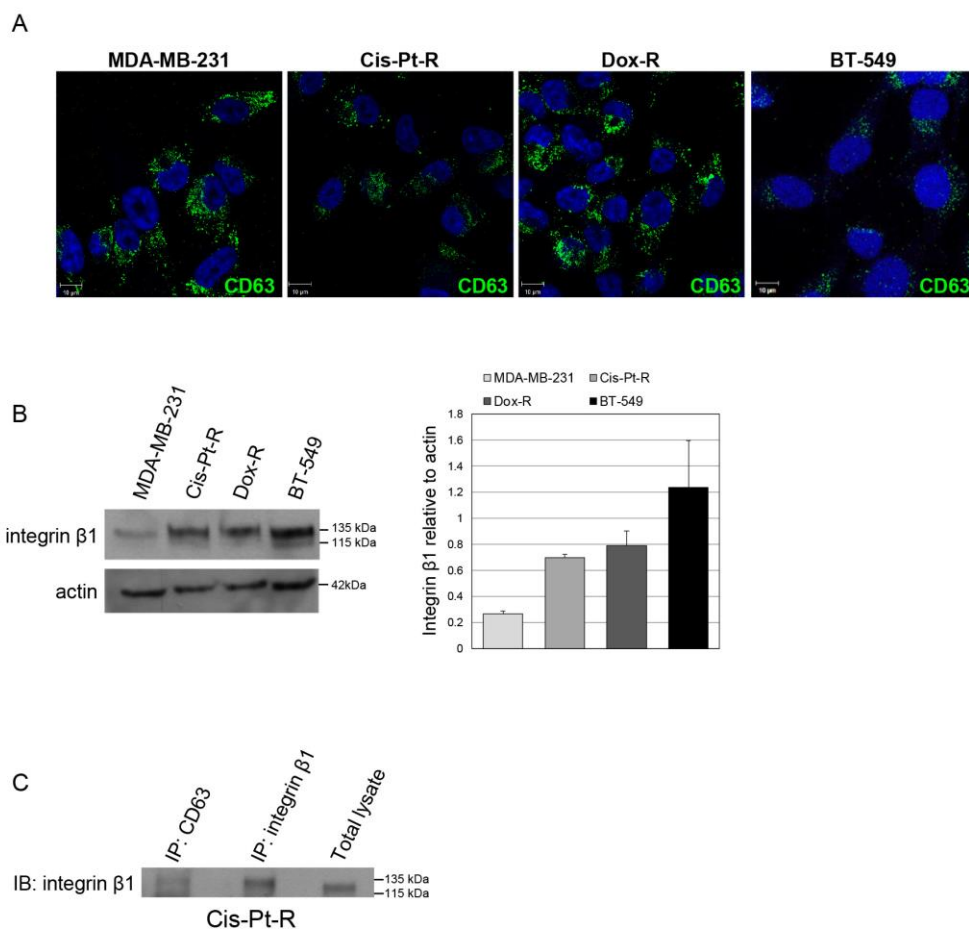

**Figure S1. CD63 and integrin  $\beta$ 1 expression in TNBC cells.** (A) MDA-MB-231, Cis-Pt-R, Dox-R and BT-549 cells were fixed and labelled with anti-CD63 antibody (green). Nuclei are visualized in blue. Magnification 63 $\times$ , 1.0 $\times$  digital zoom, scale bar = 10  $\mu$ m. All digital images were captured at the same setting to allow direct comparison of staining patterns. (B) Lysates from MDA-MB-231, Cis-Pt-R, Dox-R and BT-549 cells were immunoblotted with anti-integrin  $\beta$ 1 antibody, by using anti-actin antibody as loading internal control. Molecular weights of indicated proteins are reported. The histogram indicates the integrin  $\beta$ 1/actin ratio. Bars depict means  $\pm$  SD of three independent experiments. (C) Anti-CD63 or anti-integrin  $\beta$ 1 immunoprecipitates (IP) from Cis-Pt-R cell lysates were subjected to immunoblot using anti-integrin  $\beta$ 1 antibody (IB). Total lysate before immunoprecipitation served as a control.
